# Supplementary material for: Hypothermic and cryogenic preservation of cardiac tissue-engineered constructs
Source: Royal Society of Chemistry journal article supplement (doi:10.1039/d3bm01908j), 2024-01-01
Supplement: d3bm01908j1.pdf [file d3bm01908j1.pdf]

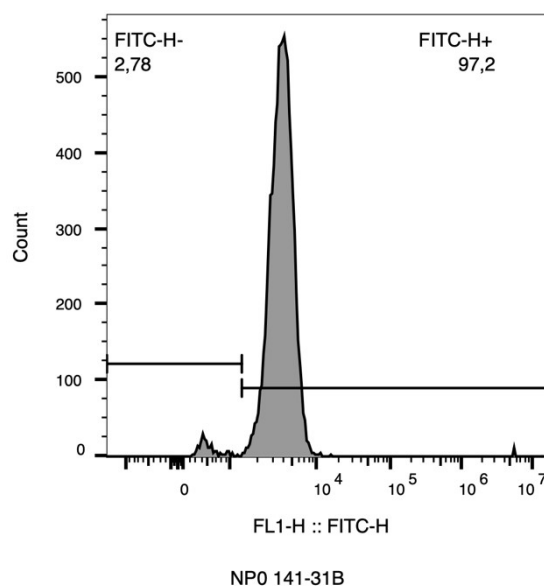

Figure S1: FACS analysis of GFP-tagged  $\alpha$ -actinin to determine NP0 141-31B iPSC-CM purity.

### Supplementary Information

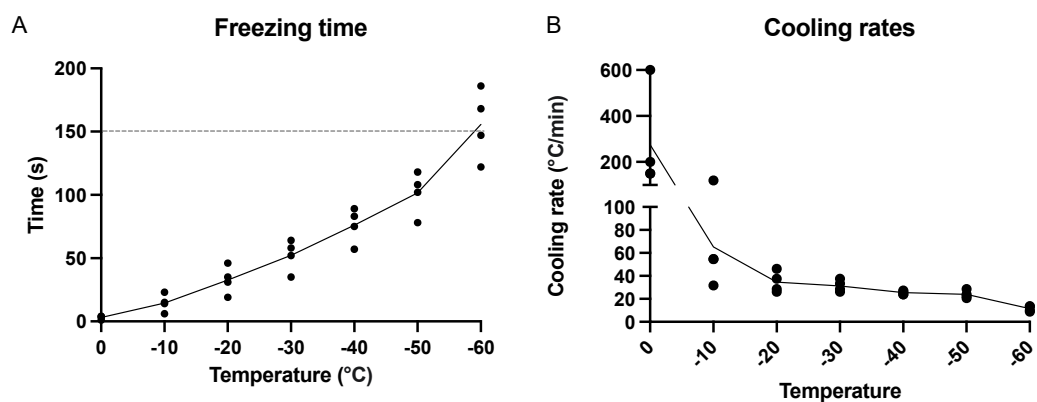

Figure S2: Determination of cooling rates during fast freezing to  $-60^{\circ}\text{C}$ . A) The sample temperature over time, measured with a submerged probe from a digital thermometer in the freezing solution, indicates rapid freezing. Fast frozen constructs were immersed in isopropanol for 150 s (marked by the gray dotted line). B) The measured cooling rate was slowest between  $-50^{\circ}\text{C}$  and  $-60^{\circ}\text{C}$  (averaging  $11.44^{\circ}\text{C}/\text{minute}$ ), still 10 times faster than the freezing rate applied to slow frozen constructs.



Figure S3: Overview of image acquisition. A) Graphical schematic representation of image locations and depth. B) Overview of the first slice, middle slice, last slice, and maximum projections of LIVE/DEAD z-stacks taken from different experimental groups and at different timepoints. Channels are overlaid. Scale bar = 100  $\mu\text{m}$

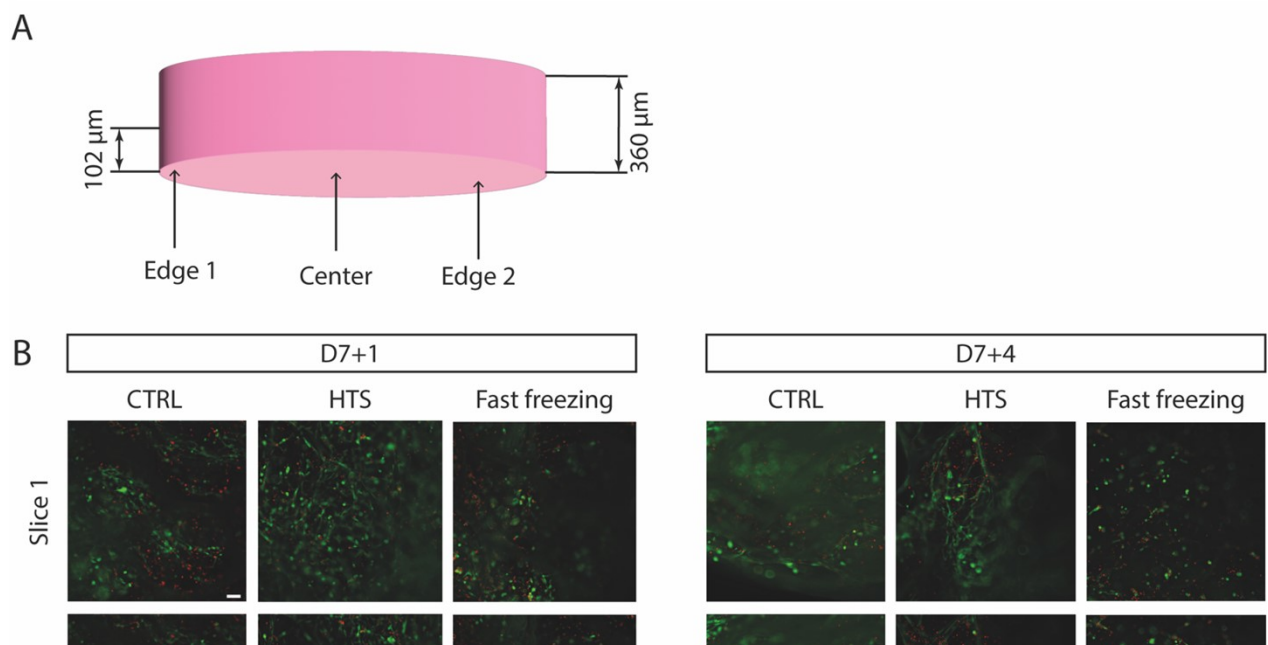

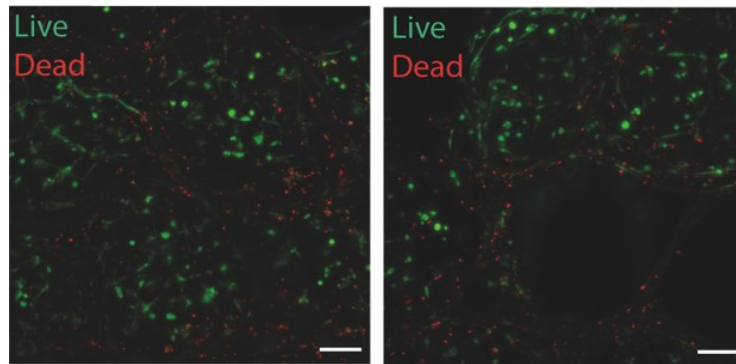

Figure S4: Live/dead imaging (D7+4) of fast frozen cTE constructs containing D21 iPSC-CMs. Living cells, (green/calcein-AM positive), and dead cells (red/ethidium homodimer-1 positive). Channels are overlaid. Scale bar = 150  $\mu$ m. Representative images are shown.

Table S1: Overview of culture media used during this study.

|                         | Base Media                                                               | Supplements                                                                                                                                                 |
|-------------------------|--------------------------------------------------------------------------|-------------------------------------------------------------------------------------------------------------------------------------------------------------|
| hfCFb culture media     | DMEM ([+] 4.5 g D-Glucose, L-Glutamine, [-] Pyruvate) (Gibco, 41965-039) | 10% Fetal bovine serum (FBS) (Biowest, S1810-500)<br>1% Penicillin-Streptomycin (Gibco, 15-140-122)                                                         |
| Construct culture media | DMEM ([+] 4.5 g D-Glucose, L-Glutamine, [-] Pyruvate) (Gibco, 41965-039) | 10% KnockOut™ serum replacement (KOSR) (Thermo Fisher Scientific, 10828028)<br>2% B27® (Gibco, 17504-001)<br>1% Penicillin-Streptomycin (Gibco, 15-140-122) |

Table S2: Overview of preservation media.

| <b>Name</b>                           | <b>Composition</b>                                                                                                                                               |
|---------------------------------------|------------------------------------------------------------------------------------------------------------------------------------------------------------------|
| Rokepie (Rp)                          | DMEM ([+] 4,5 g/L D-Glucose, L-Glutamine, [-] Pyruvate) (Gibco, 4965-039) + 5% Rokepie-FD01® (Rokepie, RS.01.10) + 1% Penicilin/streptomycin (Gibco, 15-140-122) |
| HypoThermosol® (HTS)                  | HypoThermosol® (HTS) (BioLife solutions, 101102)                                                                                                                 |
| University of Wisconsin (UW) solution | Costorsol™ (PreservationSolutions)                                                                                                                               |
| Standard freezing media               | Fetal bovine serum (FBS) (Biowest, S1810-500) + 10% Dimethyl Sulfoxide (DMSO) (Sigma-Aldrich, D2650)                                                             |

*Table S3: Antibodies list used for fluorescent immunohistochemistry experiments.*

| <b>Antibody host and target</b> | <b>Reference</b>  |
|---------------------------------|-------------------|
| Rabbit anti-cardiac Troponin T  | Abcam ab45932     |
| Mouse anti- $\alpha$ -actinin   | Merck A7811, USA  |
| AlexaFluor goat anti-rabbit 568 | Invitrogen A11036 |
| AlexaFluor goat anti-mouse 488  | Invitrogen A11029 |
| Hoechst 33342                   | Invitrogen H3570  |

## List of supplementary videos

Video S1 CTRL D7+4 BR

Video S2 HTS D7+4 BR

Video S3 CRYO Slow Freezing D7+4 BR

Video S4 CRYO Fast Freezing D7+4 BR

Video S5 D10 iPSC-CMs pre-preservation

Video S6 D14 iPSC-CMs pre-preservation

Video S7 D21 iPSC-CMs pre-preservation

Video S8 d14 iPSC-CMs D7+3 CTRL

Video S9 d14 iPSC-CMs D7+3 HTS

Video S10 d14 iPSC-CMs D7+3 Fast Freezing

Video S11 d21 iPSC-CMs D7+3 CTRL

Video S12 d21 iPSC-CMs D7+3 HTS

Video S13 d21 iPSC-CMs D7+3 Fast Freezing

Video S14 CTRL D7+4 CAL520

Video S15 HTS D7+4 CAL520

Video S16 CRYO Fast Freezing D7+4 CAL520
